# Supplementary material
Source: PubMed Central journal article supplement (PMC5042142)
Supplement: NIHMS802718-supplement-4.pdf [file NIHMS802718-supplement-4.pdf]

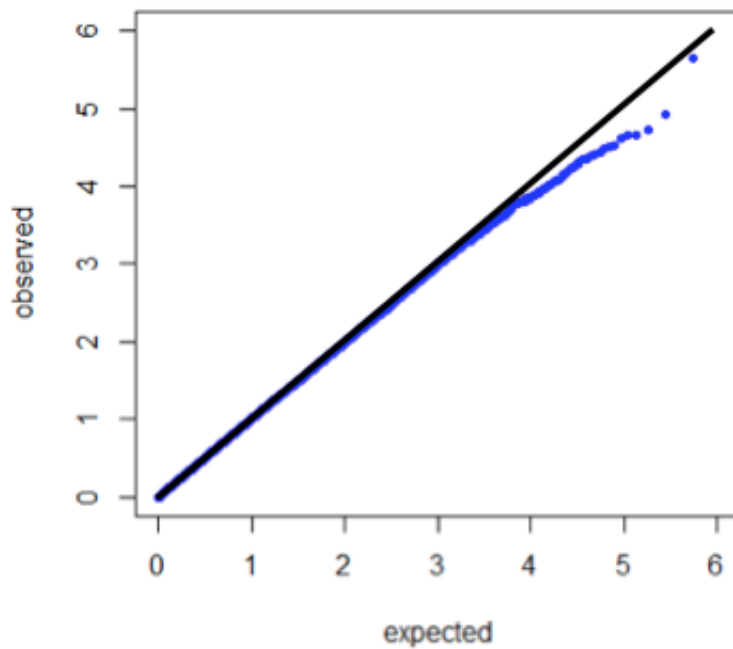

**Figure S2.** Moroccan family-based PTB GWAS QQ plot displaying the ranked FBAT p-values obtained under the additive model in the Moroccan family-based GWA study against ranked expected values under the null hypothesis of no true positives across autosomes (Blue dots). The black diagonal line shows the expected result if the observed data matched the null hypothesis. The genomic inflation factor is 1.012.
